# Supplementary material for: Robust delivery of RIG‐I agonists using extracellular vesicles for anti‐cancer immunotherapy
Source: PubMed Central journal article supplement (PMC9013404; doi:10.1002/jev2.12187), 2022-04-16
Supplement: JEV2-11-e12187-s001.pdf [file JEV2-11-e12187-s001.pdf]

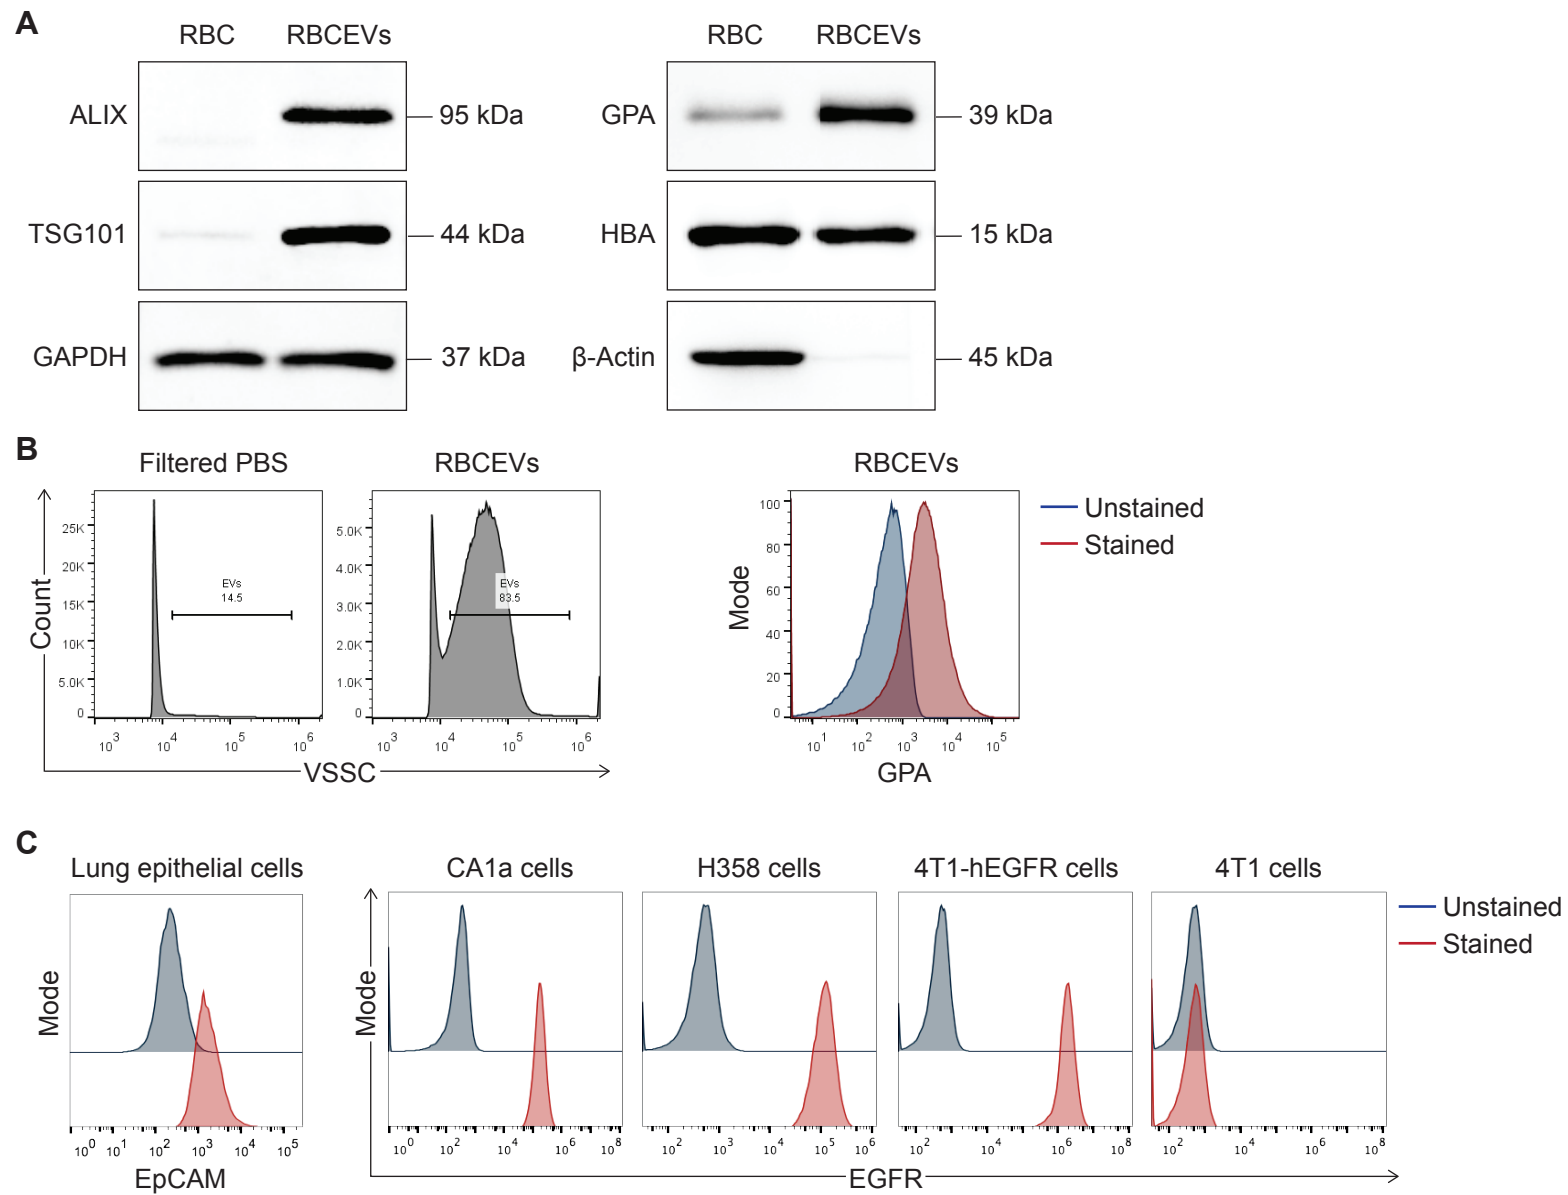

**Figure S1| Characterization of RBCEVs, mouse lung epithelial cells and  $\alpha$ -EGFR-VHH binding affinity**

**(A)** Western blot of ALIX, TSG101, GPA, HBA,  $\beta$ -actin and GAPDH in RBCs and RBCEVs. **(B)** Single-EV flow cytometry analysis of GPA in RBCEVs with a gating strategy to obtain a distinct population of RBCEVs from the background noise. **(C)** Flow cytometry analysis of EpCAM expression in mouse lung epithelial cells and  $\alpha$ -EGFR-VHH binding affinity to multiple cells.

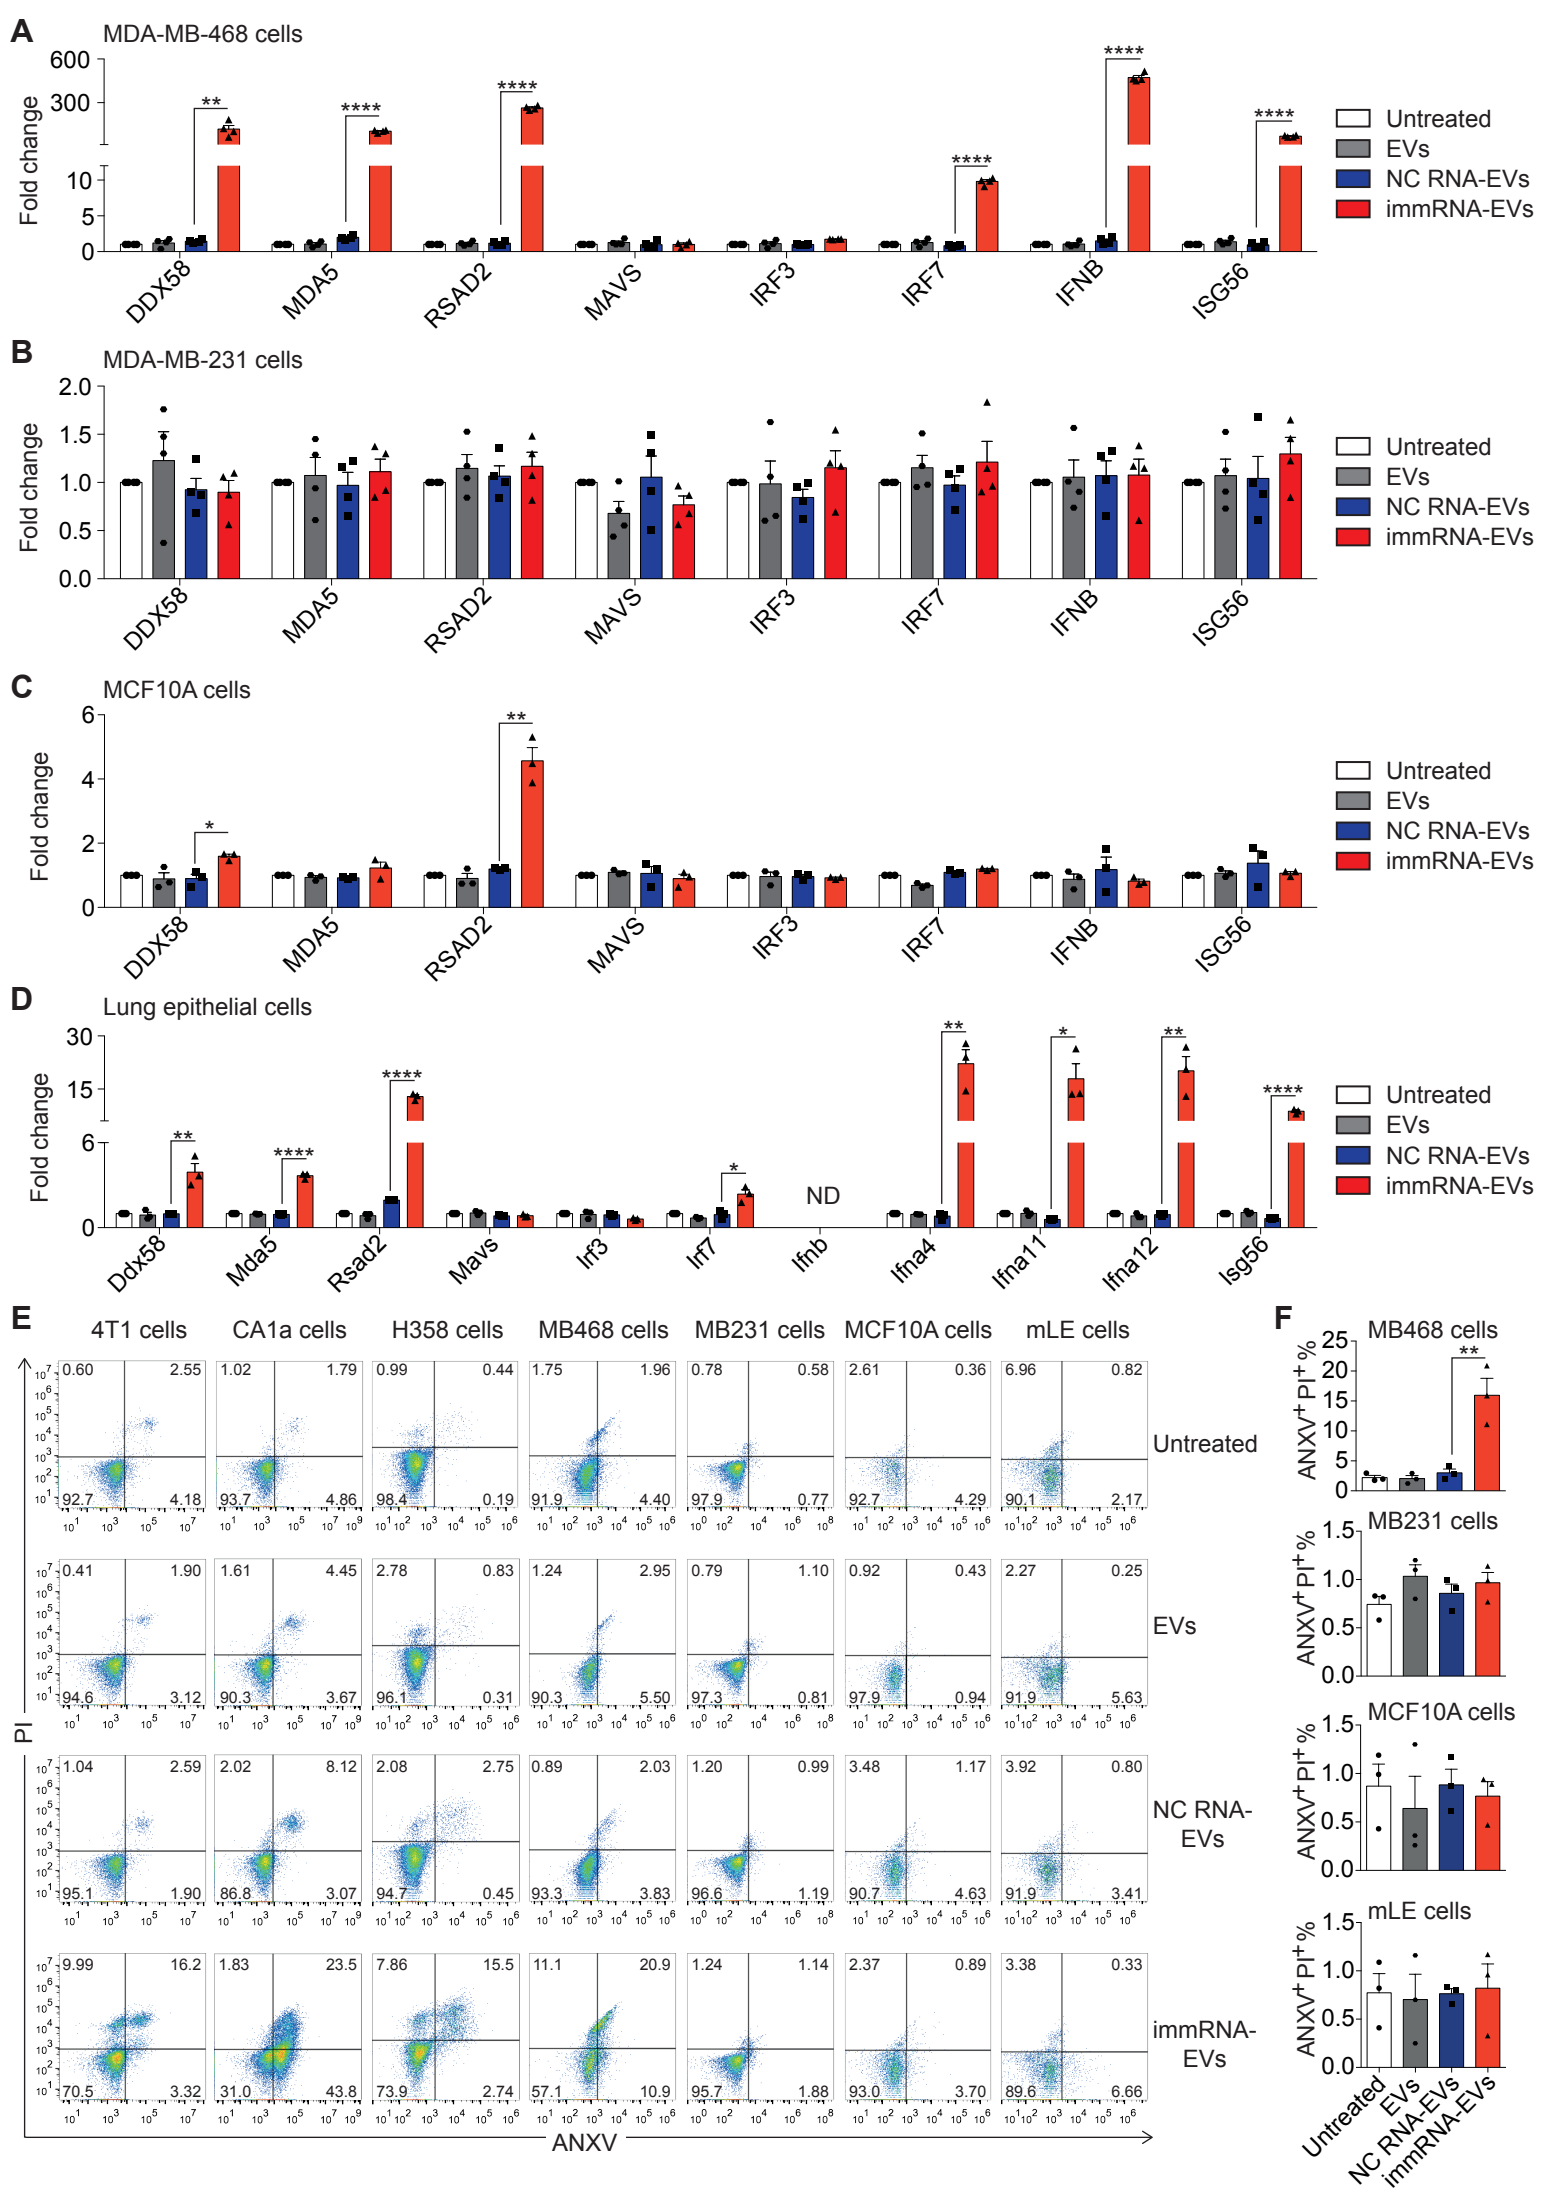

**Figure S2| The effects of immRNA-loaded RBCEVs on cancer cells and non-malignant cells**

**(A-D)** qPCR analysis of *DDX58* and its downstream effectors relative to *GAPDH* in MDA-MB-468 (A), MDA-MB-231 (B), MCF10A (C) and mouse lung epithelial cells (D) treated with 0.1  $\mu\text{g}/\mu\text{L}$  unloaded or NC-RNA-loaded, immRNA-loaded RBCEVs for 24 hours (n = 3-4, RNA loaded using REG1) ND, not detected. **(E)** Representative flow cytometric plots of ANXV/PI staining in 4T1, CA1a, H358, MDA-MB-468 (MB468), MDA-MB-231 (MB231), MCF10A and mouse lung epithelial (mLE) cells treated with 0.1  $\mu\text{g}/\mu\text{L}$  unloaded RBCEVs, NC RNA-loaded RBCEVs and immRNA-loaded RBCEVs for 72 hours. **(F)** Average percentage of ANXV<sup>+</sup>PI<sup>+</sup> population in MB468, MB231, MCF10A and mLE cells treated with RBCEVs as in (E) (n = 3). All bar graphs represent mean  $\pm$  SEM. \**P* < 0.05, \*\**P* < 0.01 and \*\*\*\**P* < 0.0001 determined by Student's two-tailed *t*-test.

**A**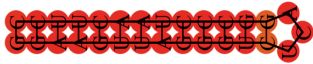**B**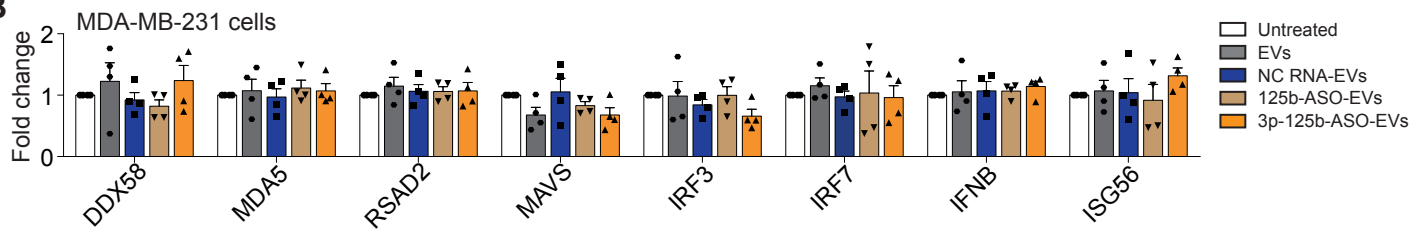**C**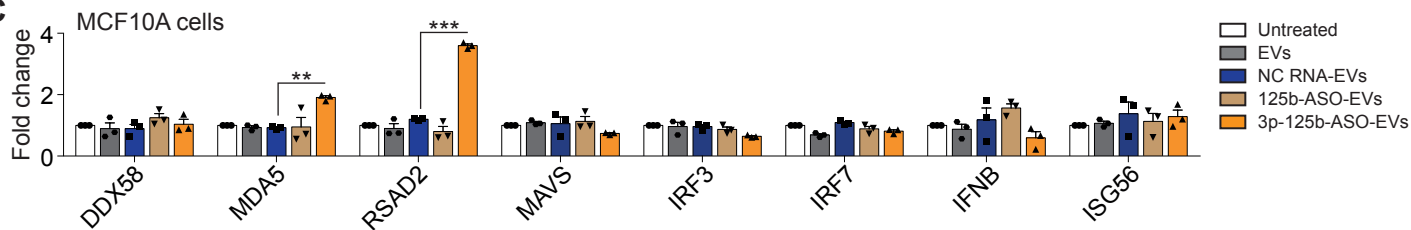**D**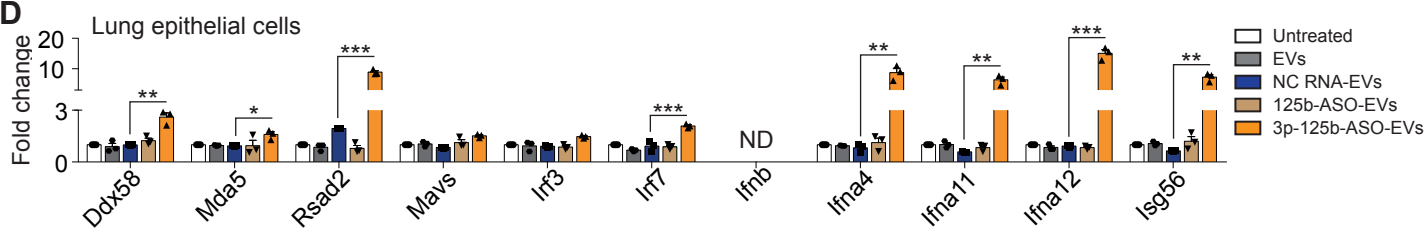**E**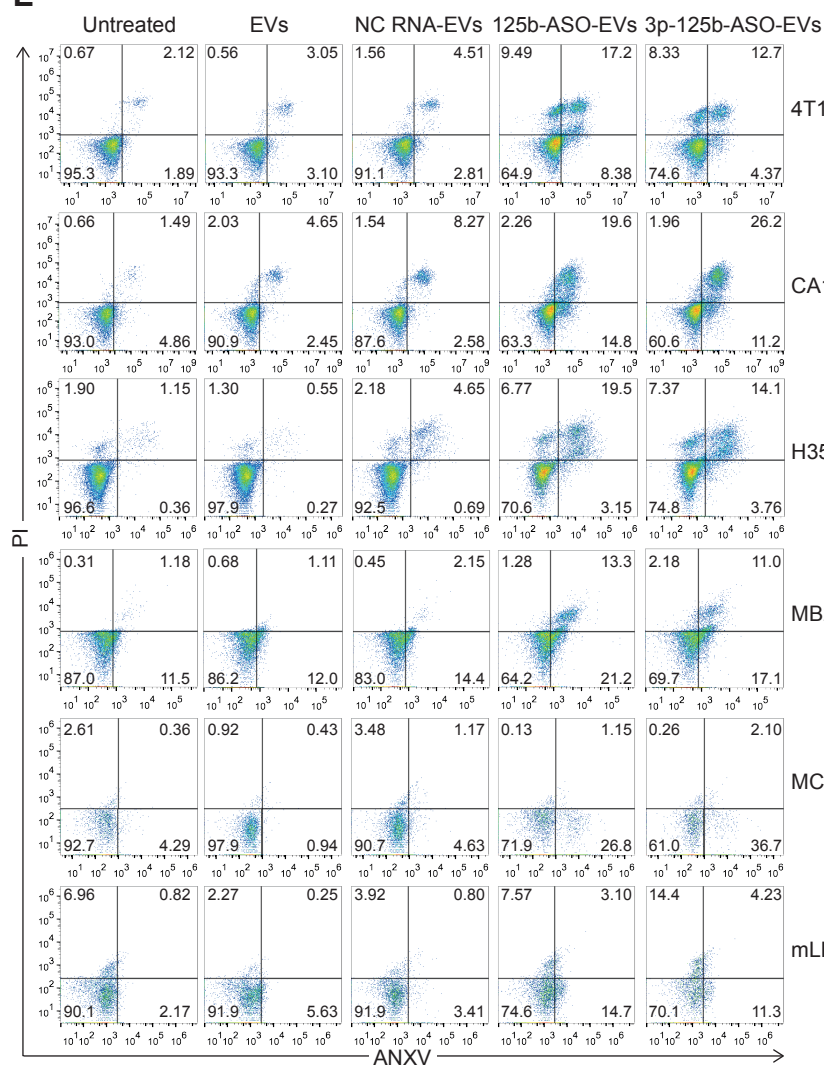**F**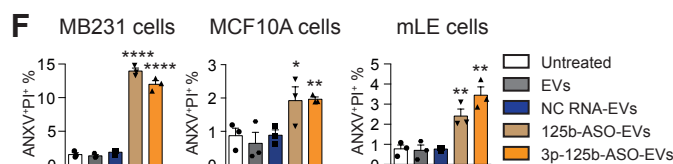**G**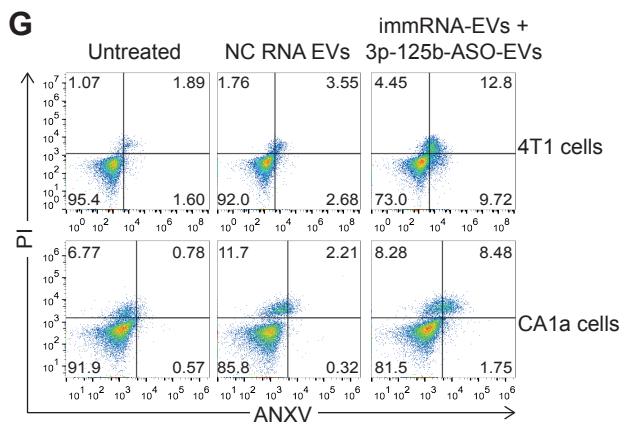**H**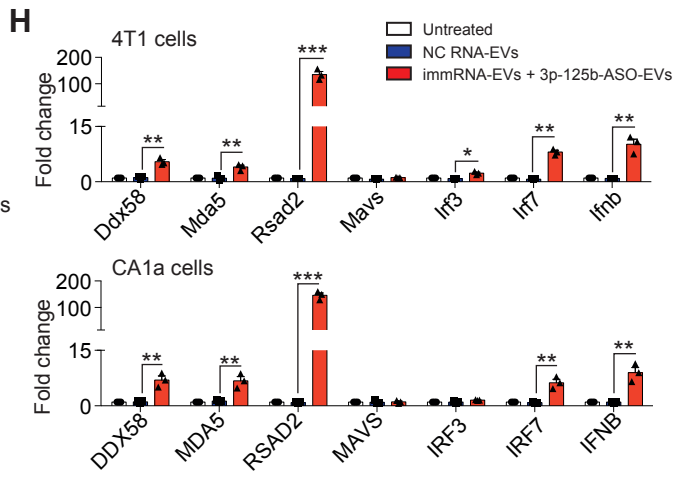

**Figure S3| The effects of 3p-125b-ASO-loaded RBCEVs on cancer cells and non-malignant cells**

**(A)** Secondary structure of 3p-125b-ASO. **(B-D)** qPCR analysis of *DDX58* and its downstream effectors relative to *GAPDH* in MDA-MB-231 (B), MCF10A (C) and mouse lung epithelial cells (D) treated with 0.1  $\mu\text{g}/\mu\text{L}$  unloaded or NC-RNA-loaded, 125b-ASO-loaded and 3p-125b-ASO-loaded RBCEVs for 24 hours (n = 3-4, RNA loaded using REG1) ND, not detected. **(E)** Representative flow cytometric plots of ANXV/PI staining in 4T1, CA1a, H358, MDA-MB-231 (MB231), MCF10A and mouse lung epithelial (mLE) cells treated with 0.1  $\mu\text{g}/\mu\text{L}$  unloaded or NC RNA-loaded, 125b-ASO-loaded and 3p-125b-ASO-loaded RBCEVs for 72 hours. **(F)** Average percentage of ANXV<sup>+</sup>PI<sup>+</sup> population in MB231, MCF10A and mLE cells treated with RBCEVs as in (E) (n = 3). **(G)** Representative flow cytometric plots of ANXV/PI staining in 4T1 cells and CA1a cells after a treatment with combined 3p-125-ASO- and immRNA-loaded RBCEVs for 72 hours. **(H)** qPCR analysis of RIG-I pathway gene expression in 4T1 cells and CA1a cells after a treatment with combined 3p-125-ASO- and immRNA-loaded RBCEVs for 24 hours. All bar graphs represent mean  $\pm$  SEM. \**P* < 0.05, \*\**P* < 0.01, \*\*\**P* < 0.001 and \*\*\*\**P* < 0.0001 determined by Student's two-tailed *t*-test.

## A Example of flow cytometric analysis

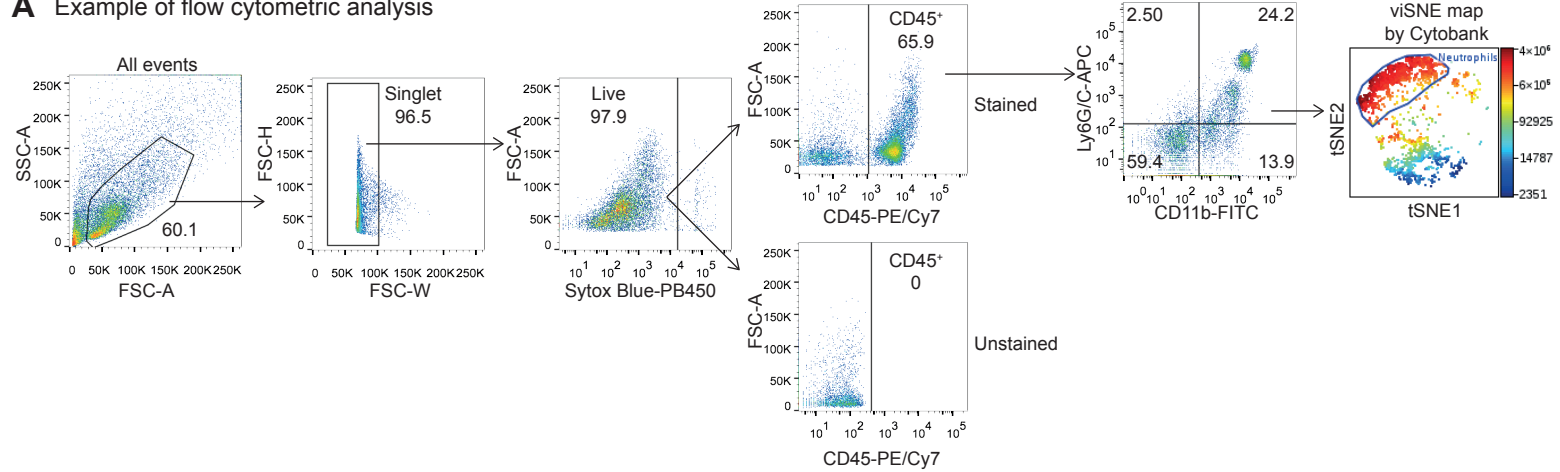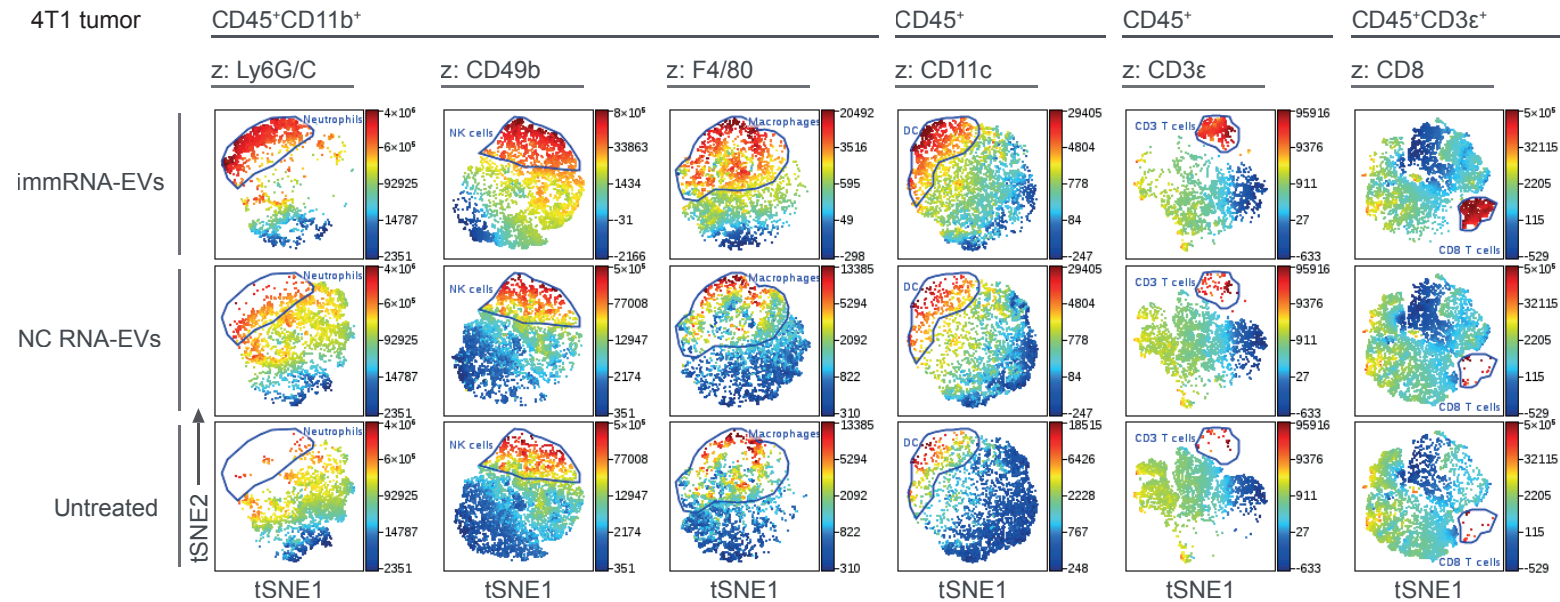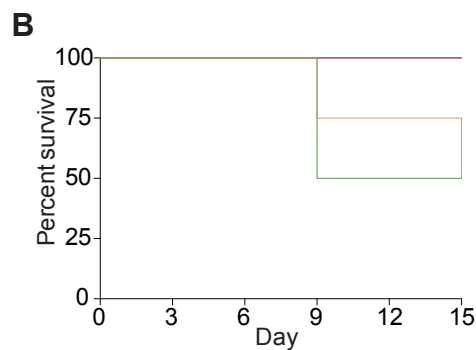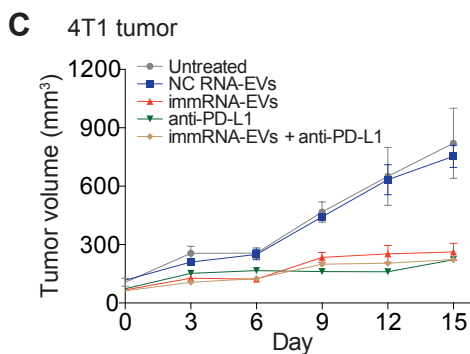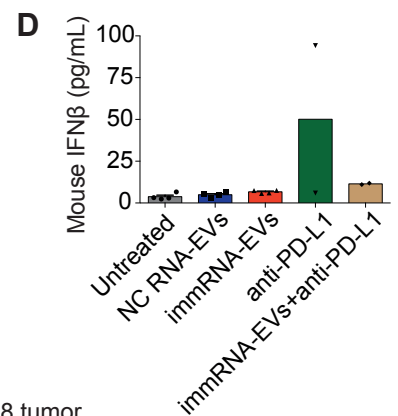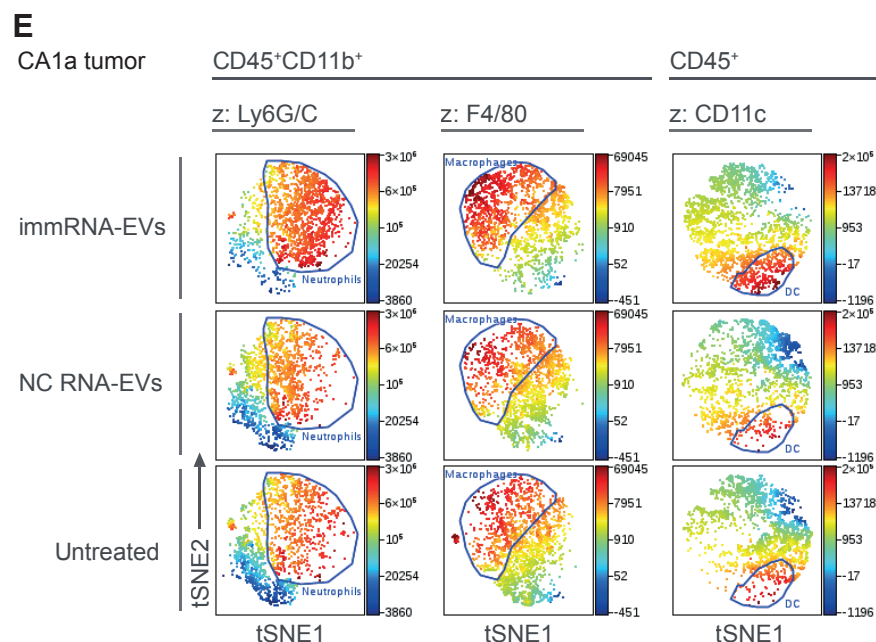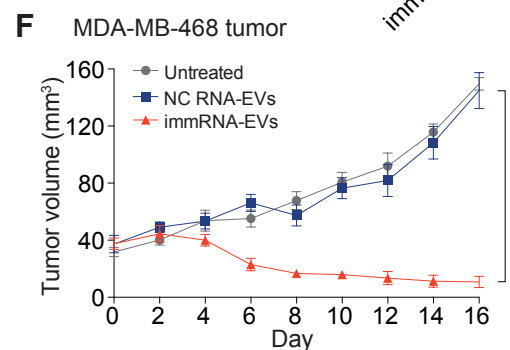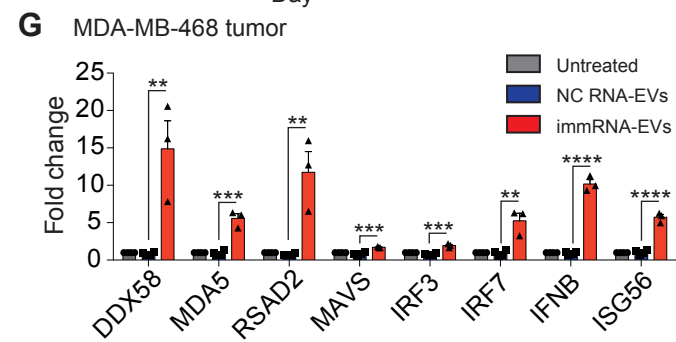

#### **Figure S4| Therapeutic efficacy of immRNA-loaded RBCEVs in mammary tumors**

**(A)** Flow cytometry analysis of immune cells in 4T1 mammary tumors treated with immRNA-loaded RBCEVs as in Figure 4. Cells were gated based on FSC-A and SSC-A to exclude the debris and dead cells. The single cells were further gated based on FSC-W and FSC-H to exclude doublets and aggregates. The live cells were gated from singlet population based on Sytox<sup>TM</sup> Blue negative. Subsequently, the fluorescence of phenotypic markers for immune cells were gated based on the fluorescent channels and subjected to viSNE analysis. **(B)** Survival of mice with orthotopic 4T1 tumors treated with 2.5 mg/kg NC-RNA-RBCEVs (i.t.), 2.5 mg/kg immRNA-RBCEVs (i.t.), 2 mg/kg anti-PD-L1 antibody (i.p.) as well as 2.5 mg/kg immRNA-RBCEVs (i.t.) in combination with 2 mg/kg anti-PD-L1 antibody (i.p.) (n = 2-4 mice). **(C)** Tumor growth of mice treated as in (B) (n = 2-4 mice). **(D)** ELISA quantification of IFN $\beta$  in the sera of mice bearing 4T1 tumors treated as in (B) (n = 2-4 mice). **(E)** Representative viSNE plots of immune cells in CA1a mammary tumors treated with immRNA-loaded RBCEVs as in Figure 4. **(F)** Volume of MDA-MB-468 tumors injected intratumorally with 2.5 mg/kg RBCEVs containing immRNA or NC RNA every three days (n = 3-4 mice). **(G)** qPCR analysis of the RIG-I pathway gene expression relative to *GAPDH* in untreated and treated MDA-MB-468 tumors (n = 3-4 mice). All bar graphs represent mean  $\pm$  SEM. \*\* $P < 0.01$ , \*\*\* $P < 0.001$  and \*\*\*\* $P < 0.0001$  determined by Student's two-tailed *t*-test.



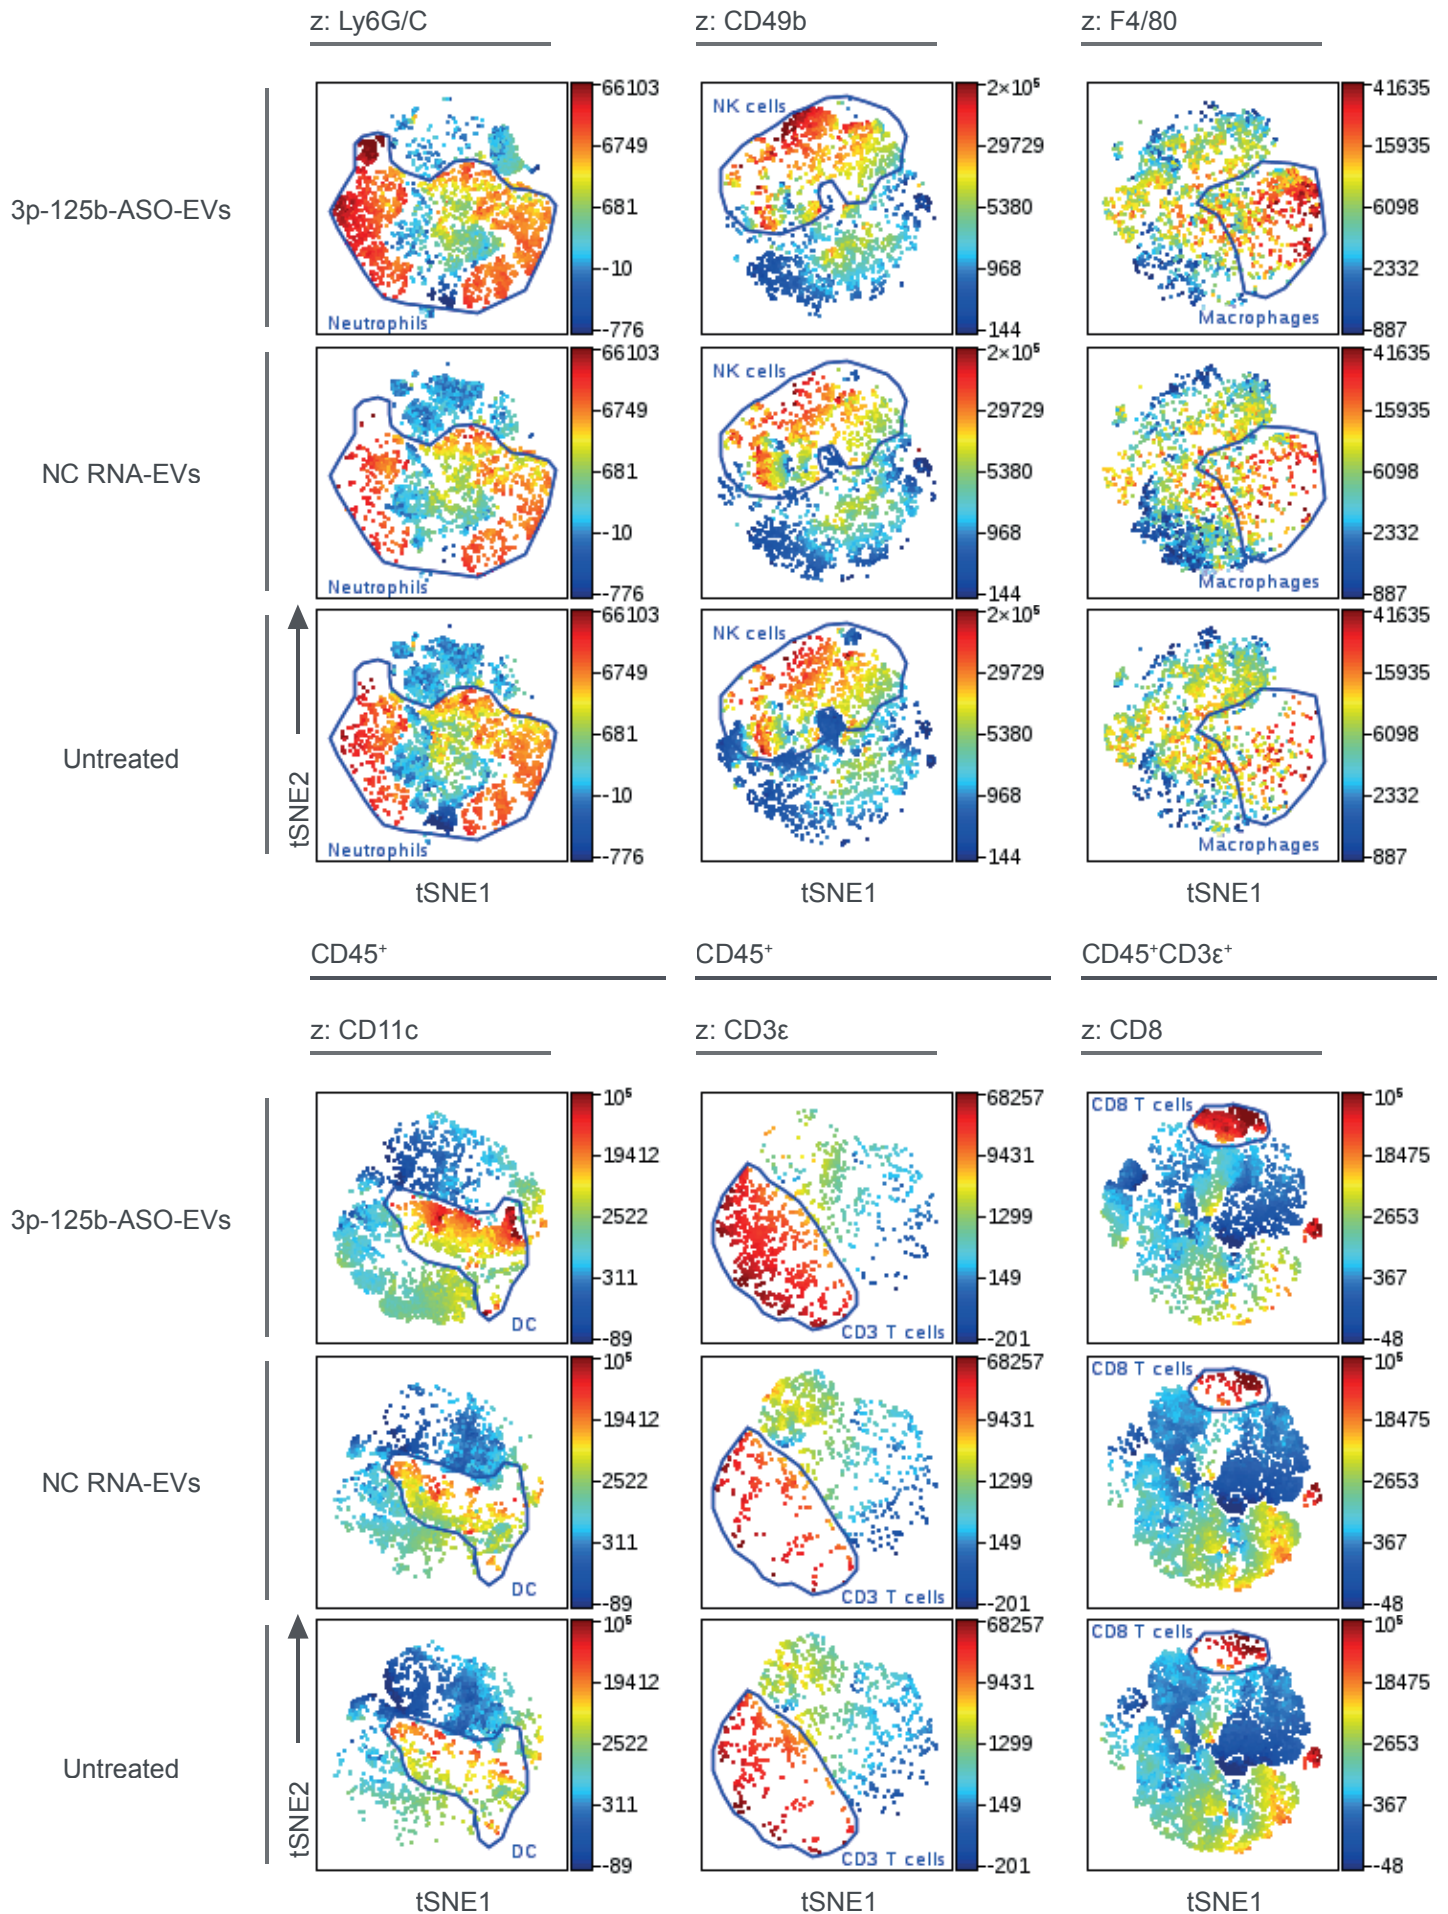

**Figure S5|** Flow cytometry analysis of immune cells in 4T1 mammary tumors treated with 3p-125b-ASO-loaded RBCEVs. Representative viSNE plots of immune cells in 4T1 mammary tumors treated with 3p-125b-ASO-loaded RBCEVs.



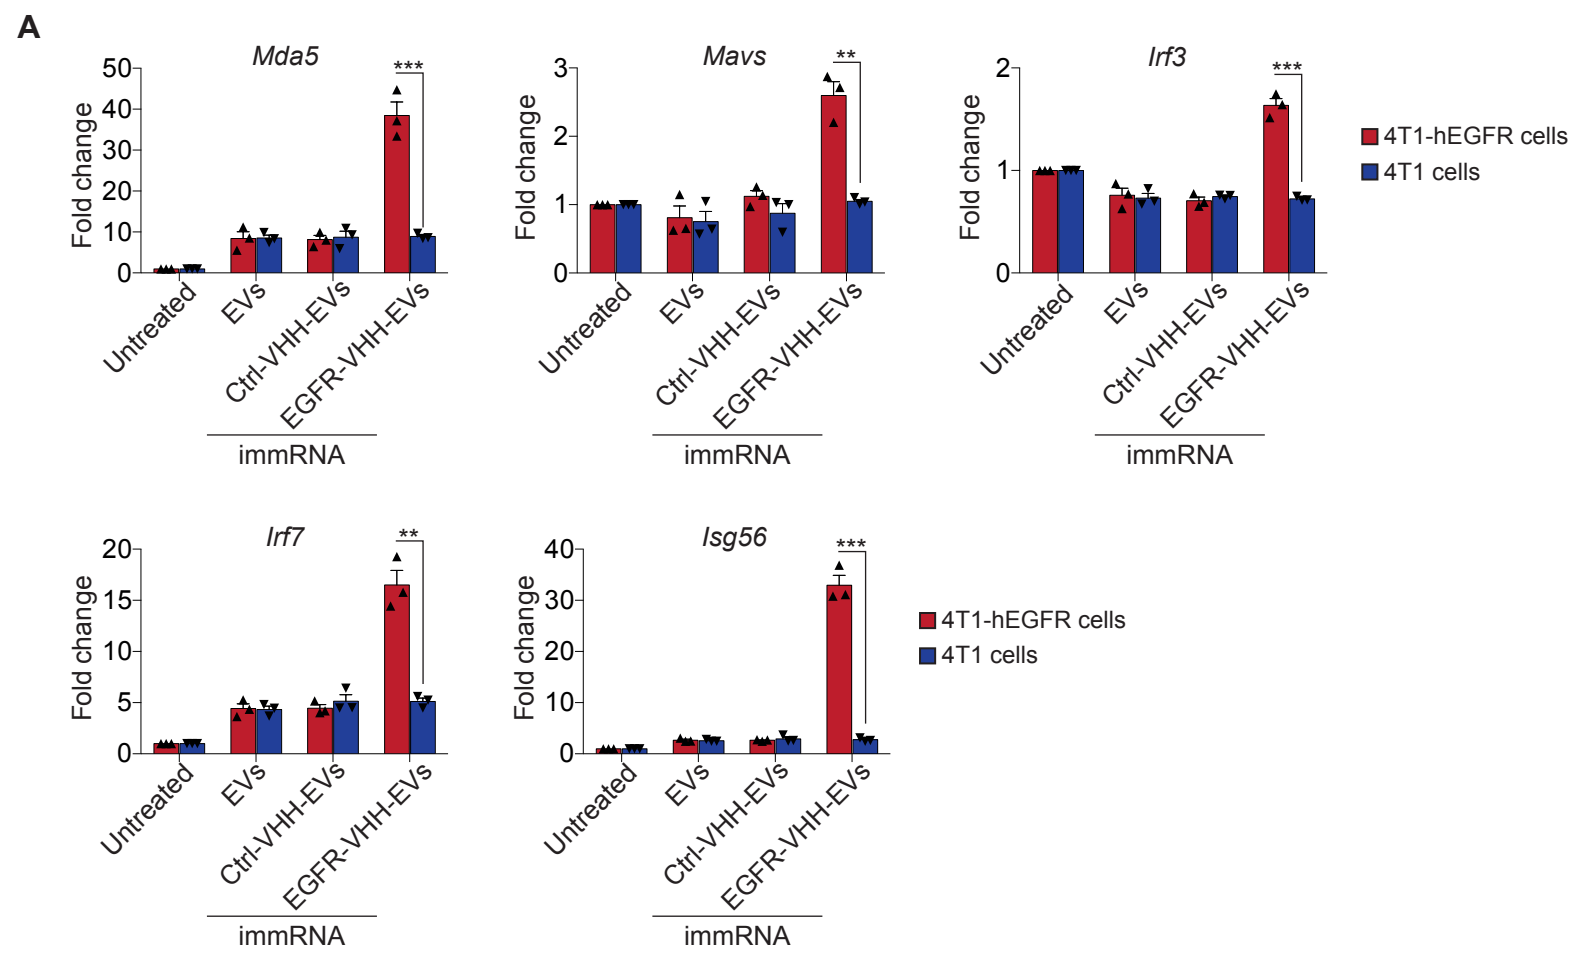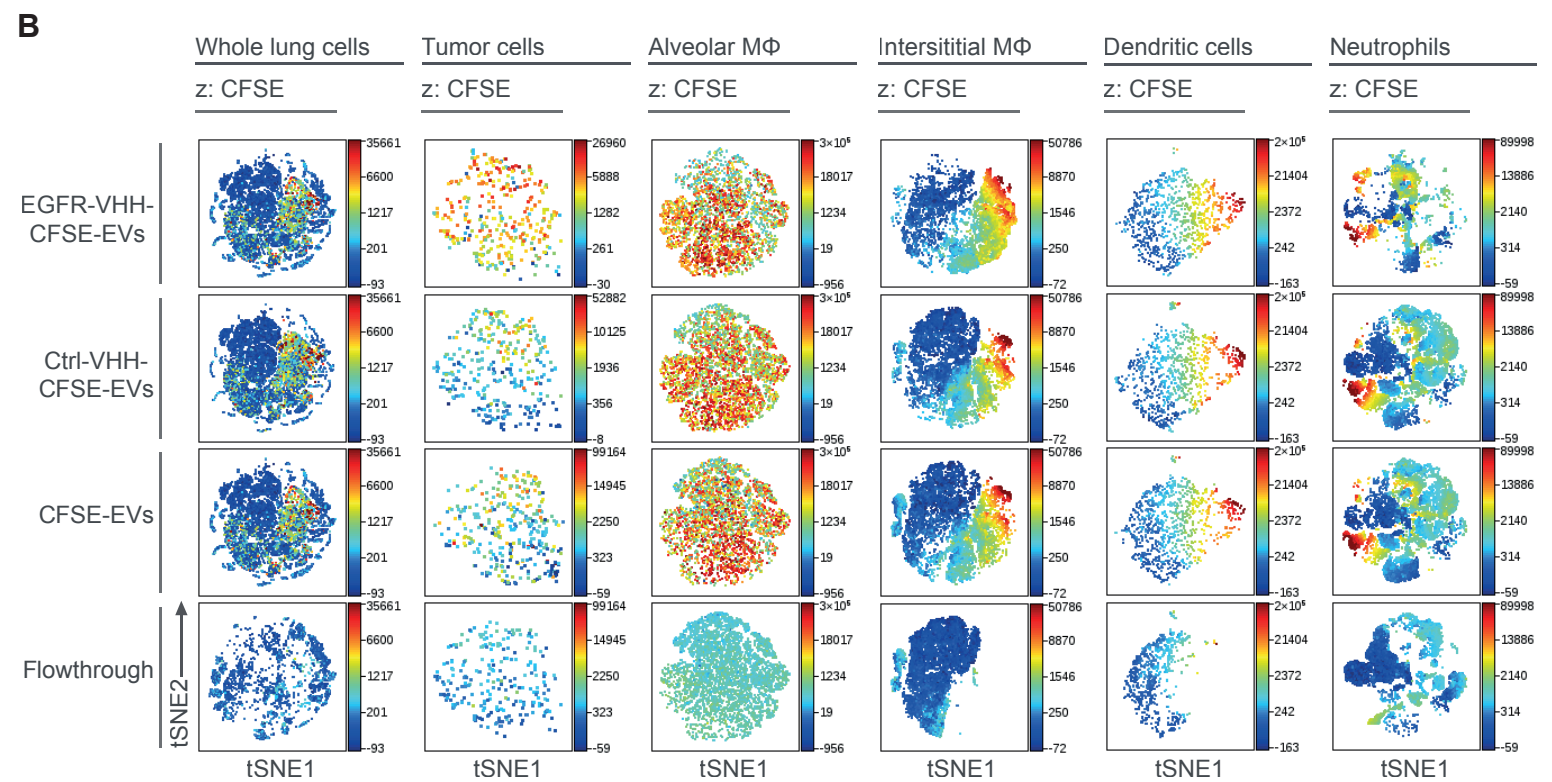

**Figure S6| EGFR-VHH-RBCEVs target 4T1-hEGFR cells *in vitro* and 4T1-hEGFR lung metastatic tumors *in vivo***  
**(A)** qPCR analysis of the RIG-I pathway gene expression relative to *Gapdh* in 4T1-hEGFR cells and parental 4T1 cells treated with 0.1  $\mu\text{g}/\mu\text{L}$  uncoated, Ctrl-VHH-coated and EGFR-VHH-coated RBCEVs containing immRNA ( $n = 3$ ). All bar graphs represent mean  $\pm$  SEM. \*\* $P < 0.01$  and \*\*\* $P < 0.001$  determined by Student's two-tailed *t*-test. **(B)** Representative viSNE plots of biodistribution of EGFR-VHH-coated CFSE-RBCEVs in respective cell type in the lungs with 4T1-hEGFR metastatic tumors.

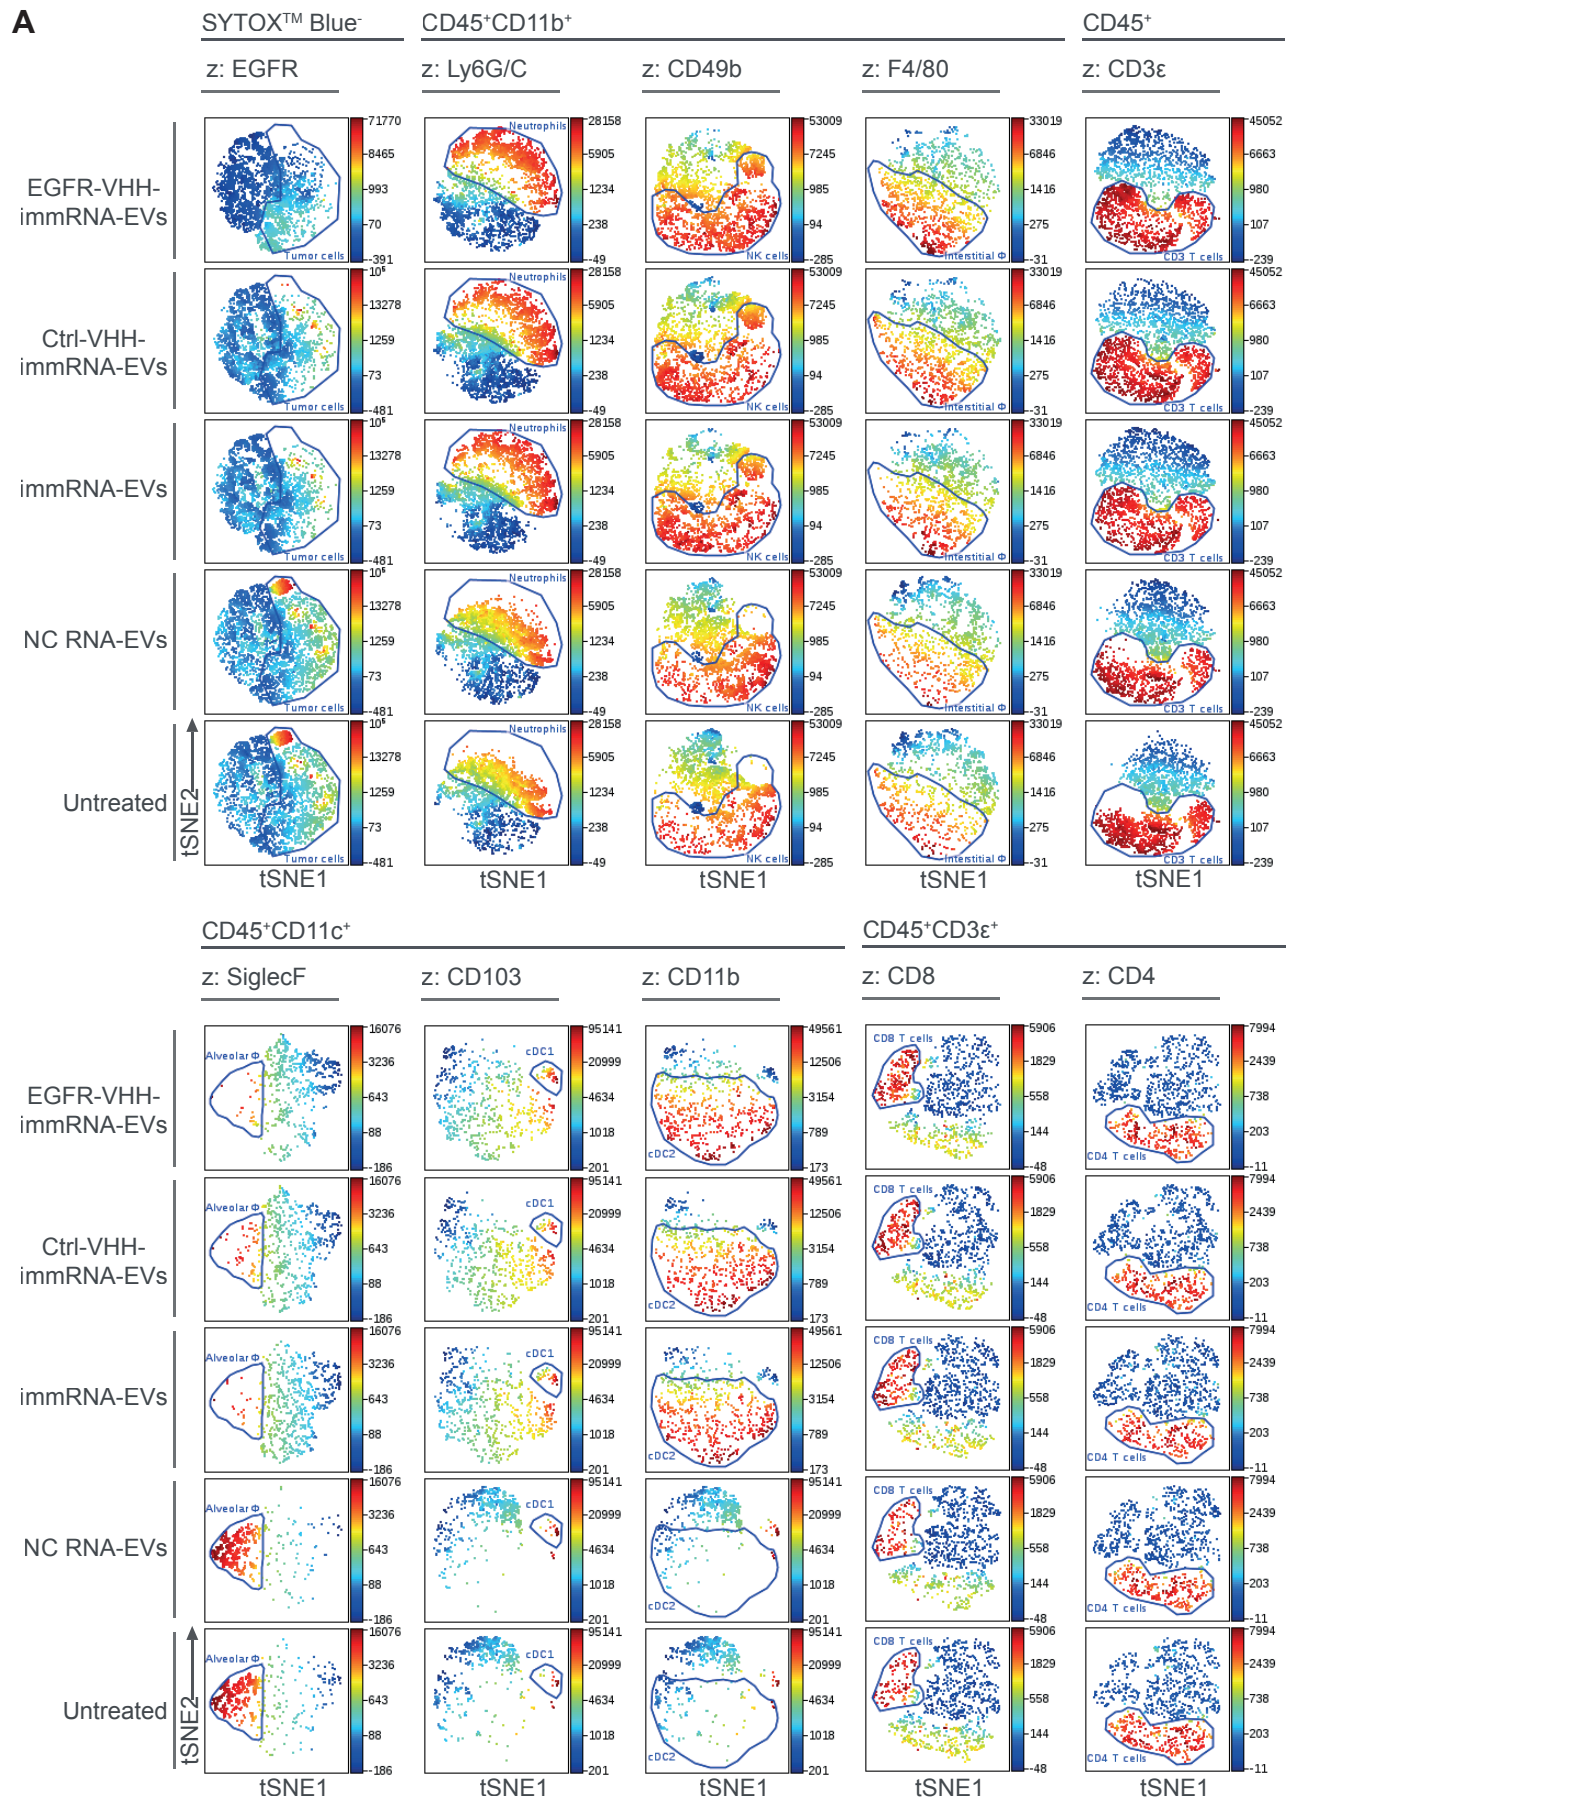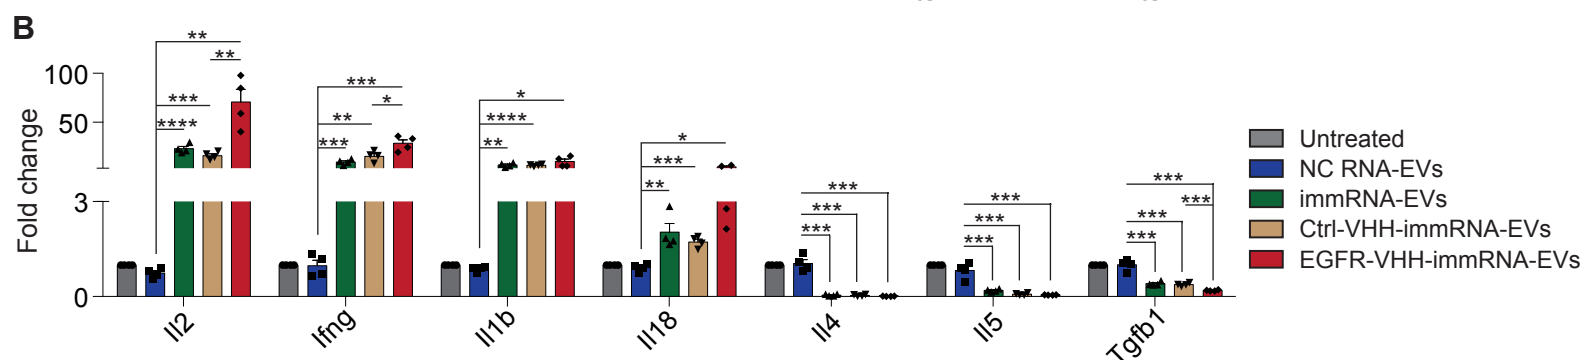

**Figure S7| Flow cytometry analysis of immune cells in the lungs with 4T1 metastatic tumors treated with EGFR-VHH-immRNA-RBCEVs**

**(A)** Representative viSNE plots of respective cell type in the lungs with 4T1 metastatic tumors treated with EGFR-VHH-immRNA-RBCEVs. **(B)** qPCR analysis of cytokine gene expression relative to *Gapdh* in the lungs of mice with 4T1-hEGFR metastatic tumors (n = 4 mice). All bar graphs represent mean  $\pm$  SEM. \* $P < 0.05$ , \*\* $P < 0.01$ , \*\*\* $P < 0.001$  and \*\*\*\* $P < 0.0001$  determined by Student's two-tailed *t*-test.

**Table S1| List of primers**

| <b>Genes</b> | <b>F/R</b> | <b>Mouse</b>                                                | <b>Human</b>                                        |
|--------------|------------|-------------------------------------------------------------|-----------------------------------------------------|
| <i>GAPDH</i> | F<br>R     | AGGTCGGTGTGAACGGATTTG<br>TG TAG ACC AT GT AG TT G AG GT CA  | GGAGCGAGATCCCTCCAAAAT<br>GGCTGTTGTCATACTTCTCATGG    |
| <i>DDX58</i> | F<br>R     | GAG AGT CAC GGG ACC CAC T<br>CGG TCT TAG CAT CTC CAA CG     | GCCATTACACTGTGCTTGGAGA<br>CCAGTTGCAATATCCTCCACCA    |
| <i>MDA5</i>  | F<br>R     | TGATGCACTATTCCAAGAATAAC<br>TCTGTGAGACGAGTTAGCCAAG           | GAGCAACTTCTTTCAACCACAG<br>CACTTCCTTCTGCCAACTTG      |
| <i>RSAD2</i> | F<br>R     | ACAGCCAAGACATCCTTCGT<br>AAAAGTTGATCTTCTCCAAACCA             | CACAAAGAAGTGTCTGCTTGGT<br>AAGCGCATATATTCATCCAGAAT   |
| <i>MAVS</i>  | F<br>R     | CTGCCTCACAGCTAGTGACC<br>CCGGCGCTGGAGATTATTG                 | AGGAGACAGATGGAGACACA<br>CAGAACTGGGCAGTACCC          |
| <i>IFNB</i>  | F<br>R     | AACCTCACCTACAGGGCGGACTT<br>C<br>TCCCACGTCAATCTTCTCTTGC<br>T | CTCTCCTGTTGTGCTTCTCC<br>GTCAAAGTTCATCCTGTCCTTG      |
| <i>IRF3</i>  | F<br>R     | CGGAAAGAAGTGTGCGGTT<br>TTTTCTGGGAGTGAGGCAG                  | ACCAGCCGTGGACCAAGAG<br>TACCAAGGCCCTGAGGCAC          |
| <i>IRF7</i>  | F<br>R     | AGGGCGTTTTATCTTGCG<br>TGGAGCCCAGCATTCTCT                    | TGGTCCTGGTGAAGCTGGAA<br>GATGTCGTCATAGAGGCTGTTG<br>G |
| <i>ISG56</i> | F<br>R     | TACAGGCTGGAGTGTGCTGAGA<br>CTCCACTTTCAGAGCCTTCGCA            | TAGCCAACATGTCCTCACAGAC<br>TCTTCTACCACTGGTTTCATGC    |
| <i>IL4</i>   | F<br>R     | ATCATCGGCATTTTGAACGAGG<br>GCAGCTCCATGAGAACAATA              |                                                     |
| <i>IL5</i>   | F<br>R     | CTCTGTTGACAAGCAATGAGACG<br>TCTTCAGTATGTCTAGCCCCTG           |                                                     |
| <i>IFNG</i>  | F<br>R     | GCCACGGCACAGTCATTGA<br>TGCTGATGGCCTGATTGTCTT                |                                                     |
| <i>IL2</i>   | F<br>R     | GTGCTCCTTGTC AACAGCG<br>GGGGAGTTTCAGGTTCTGTA                |                                                     |
| <i>TGFB1</i> | F<br>R     | CTTCAATACGTCAGACATTCGGG<br>GTAACGCCAGGAATTGTTGCTA           |                                                     |
| <i>IL1B</i>  | F<br>R     | GCAACTGTTCTGAACTCAACT<br>ATCTTTTGGGGTCCGTCAACT              |                                                     |
| <i>IL18</i>  | F<br>R     | GACTCTTGCGTCAACTTCAAGG<br>CAGGCTGTCTTTTGTCAACGA             |                                                     |
| <i>IL10</i>  | F<br>R     | AGCCTTATCGGAAATGATCCAGT<br>GGCCTTGTAGACACCTTGGT             |                                                     |
| <i>IL6</i>   | F<br>R     | TCTATACCACTTCACAAGTCGGA<br>TCTATACCACTTCACAAGTCGGA          |                                                     |
| <i>IL12B</i> | F<br>R     | TGGTTTGCCATCGTTTTGCTG<br>ACAGGTGAGGTTCACTGTTTCT             |                                                     |

---

|            |   |                        |
|------------|---|------------------------|
| <i>TNF</i> | F | CCTGTAGCCCACGTCGTAG    |
|            | R | GGGAGTAGACAAGGTACAACCC |

---

|              |   |                            |
|--------------|---|----------------------------|
| <i>IFNA4</i> | F | CTGGTAATGATGAGCTACTACTG    |
|              | R | G<br>CCTTCTCCAAGGGGAATCCAA |

---

|               |   |                      |
|---------------|---|----------------------|
| <i>IFNA11</i> | F | GGTCCTGGCACAATGAGGA  |
|               | R | TCCAAGCAGCAGATGAGTCC |

---

|               |   |                         |
|---------------|---|-------------------------|
| <i>IFNA12</i> | F | AAGACTGAGTGAGAAGGAGTGAG |
|               | R | GAGATGCCAGAATTTGAGCAGTG |

---
